# Supplementary material
Source: PubMed Central journal article supplement (PMC2957185)
Supplement: NIHMS220900-supplement-Supplementary_Data.pdf [file NIHMS220900-supplement-Supplementary_Data.pdf]

**Figure S1.** Histoblots of coronal cryosections of RML-infected mouse brain. Frozen sections of 10  $\mu\text{m}$  were transferred to nitrocellulose and either left untreated (native, **A**) or denatured in 3 M guanidine thiocyanate (**B**). Denatured samples were also either digested with proteinase K (50  $\mu\text{g}/\text{mL}$ , 18 h at 37  $^{\circ}\text{C}$ ; **C**) or reduced in 10% 2-mercaptoethanol (18 h at room temperature; **D**). Membranes were then blocked with 1% IgG-free BSA (Jackson) in TBS-T buffer, incubated with F4-31 mAb (1  $\mu\text{g}/\text{mL}$ ) then goat anti-mouse HRP (1:5000; Pierce), detected with ECL (Supersignal; Pierce), and imaged with a FluoroChem HD2 (AlphaInnotech, CA).

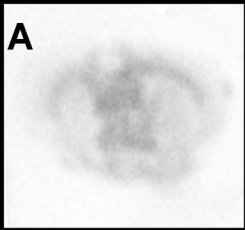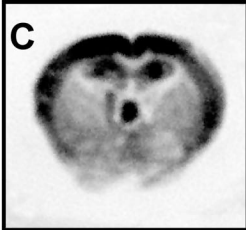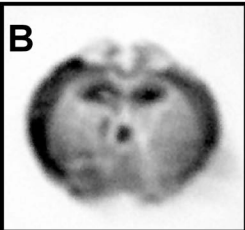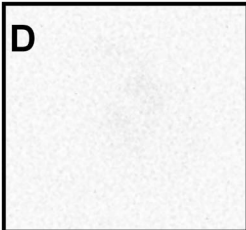

**Supplemental Table I. Antibody binding to synthetic BoPrP peptides by ELISA.**

| BoPrP Sequence | Antibody |        |       | BoPrP Sequence | Antibody             |        |       |
|----------------|----------|--------|-------|----------------|----------------------|--------|-------|
|                | F4-31    | F10-26 | HuM-P |                | F4-31                | F10-26 | HuM-P |
| 95–106         | 0.04     | 0.066  | 0.06  | 170–181        | 0.05                 | 0.071  | 0.06  |
| 100–111        | 0.04     | 3.43   | 1.73  | 175–186        | 0.02                 | 0.066  | 0.06  |
| 105–116        | 0.04     | 3.398  | 2.11  | 180–191        | 0.03                 | 0.077  | 0.06  |
| 110–121        | 0.05     | 0.44   | 0.13  | 185–196        | 0.05                 | 0.066  | 0.10  |
| 115–126        | 0.06     | 0.073  | 0.05  | 190–201        | 0.03                 | 0.062  | 0.06  |
| 120–131        | 0.05     | 0.064  | 0.06  | 195–206        | 0.05                 | 0.067  | 0.06  |
| 125–135        | 0.02     | 0.061  | 0.06  | 200–211        | nd                   | 0.062  | nd    |
| 130–141        | 0.03     | 0.072  | 0.06  | 205–216        | 0.04                 | 0.071  | 0.14  |
| 135–146        | 0.02     | 0.066  | 0.07  | 210–221        | 0.01                 | 0.064  | 0.07  |
| 140–151        | 0.04     | 0.071  | 0.06  | 215–226        | 0.02                 | 0.068  | 0.06  |
| 145–156        | 0.07     | 0.066  | 0.08  | 220–231        | 0.03                 | 0.098  | 0.06  |
| 150–161        | 0.03     | 0.44   | 0.08  | 225–236        | 0.04                 | 0.05   | 0.056 |
| 155–166        | 0.03     | 0.075  | 0.06  | 230–241        | 0.04                 | 0.069  | 0.052 |
| 160–171        | 0.04     | 0.063  | 0.05  | 102–241        | <a href="#">1.61</a> | 0.85   | 1.50  |
| 165–176        | 0.05     | 0.069  | 0.06  |                |                      |        |       |

*nd = not determined.*

**Supplemental Table II. Antibody binding to synthetic HuPrP peptides by ELISA.**

| HuPrP Sequence | Antibody |      | HuPrP Sequence | Antibody |      |
|----------------|----------|------|----------------|----------|------|
|                | F20-89a  | 3F4  |                | F20-89a  | 3F4  |
| 88–97          | 0.09     | 0.08 | 154–163        | 0.15     | 0.14 |
| 91–100         | 1.05     | 0.08 | 157–166        | 0.12     | 0.11 |
| 94–103         | 1.55     | 0.09 | 160–169        | 0.11     | 0.08 |
| 97–106         | 1.24     | 0.21 | 163–172        | 0.09     | 0.08 |
| 100–109        | 0.09     | 1.68 | 166–175        | 0.08     | 0.08 |
| 103–112        | 0.09     | 1.40 | 169–178        | 0.08     | 0.08 |
| 106–115        | 0.09     | 1.38 | 172–181        | 0.08     | 0.09 |
| 109–118        | 0.09     | 0.09 | 175–184        | 0.08     | 0.09 |
| 112–121        | 0.09     | 0.08 | 178–187        | 0.09     | 0.09 |
| 115–124        | 0.09     | 0.08 | 181–190        | 0.09     | 0.10 |
| 118–127        | 0.09     | 0.08 | 184–193        | 0.09     | 0.09 |
| 121–130        | 0.09     | 0.10 | 187–196        | 0.08     | 0.08 |
| 124–133        | 0.08     | 0.10 | 190–199        | 0.08     | 0.08 |
| 127–136        | 0.09     | 0.10 | 193–202        | 0.08     | 0.10 |
| 130–139        | 0.08     | 0.10 | 196–205        | 0.09     | 0.09 |
| 133–142        | 0.09     | 0.09 | 199–208        | 0.09     | 0.08 |
| 136–145        | 0.09     | 0.08 | 202–211        | 0.09     | 0.09 |
| 139–148        | 0.09     | 0.08 | 205–214        | 0.09     | 0.08 |
| 142–151        | 0.09     | 0.08 | 208–217        | 0.09     | 0.10 |
| 145–154        | 0.35     | 0.08 | 211–220        | 0.08     | 0.08 |
| 148–157        | 0.10     | 0.09 | 214–223        | 0.09     | 0.09 |
| 151–160        | 0.09     | 0.08 | 217–226        | 0.10     | 0.09 |
